# Supplementary material for: Light-modulated aggregation behavior of some unsubstituted cinnamate-based ionic liquids in aqueous solutions
Source: Royal Society of Chemistry journal article supplement (doi:10.1039/c5ra20772j), 2015-01-01

## Electronic supplementary information

### Light-Modulated Aggregation Behavior of Some Unsubstituted Cinnamate-Based Ionic Liquids in Aqueous Solutions

Jie Yang,<sup>a,c</sup> Huiyong Wang,<sup>ab</sup> Jianji Wang,<sup>\*ab</sup> Xiaojia Guo<sup>ab</sup> and Yue Zhang<sup>ab</sup>

<sup>a</sup> Henan Key Laboratory of Green Chemical Media and Reactions, School of Chemistry and Chemical Engineering, Henan Normal University, Xinxiang, Henan 453007, P. R. China

<sup>b</sup> Collaborative Innovation Center of Henan Province for Green Manufacturing of Fine Chemicals, Key Laboratory of Green Chemical Media and Reactions, Ministry of Education, Henan Normal University, Xinxiang, Henan 453007, P. R. China

<sup>c</sup> School of Basic Medicine, Xinxiang Medical University, Xinxiang, Henan 453007, P. R. China

#### Synthesis and characteristics of [C<sub>n</sub>mim][CA](n = 4, 6, 8, 10, 12) ionic liquids

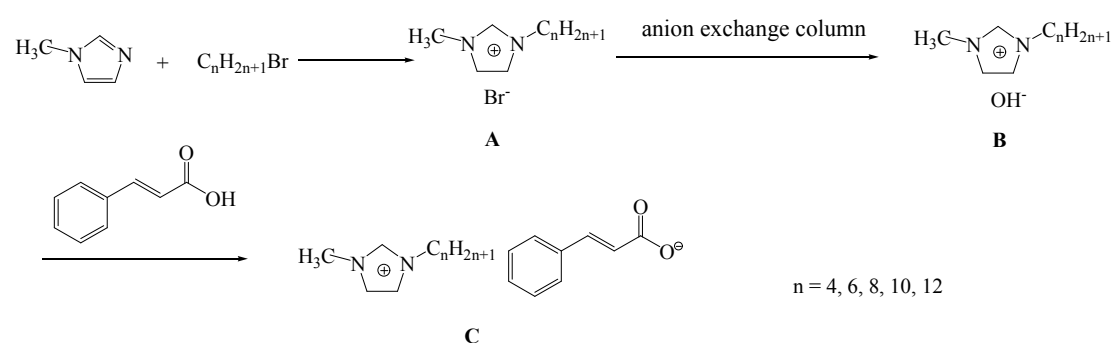

Scheme S1. Synthetic route of the photo-responsive ionic liquids

#### 1-dodecyl-3-methylimidazolium ortho-methoxycinnate ([C<sub>12</sub>mim][CA]):

<sup>1</sup>H NMR ((DMSO-d<sub>6</sub>):  $\delta$  = 9.79 (1H, s), 7.84 (1H, s), 7.76 (1H, s), 7.43(2H, d), 7.30 (2H, t), 7.22 (1H, t), 7.03 (1H, d), 6.35 (1H, d), 4.17 (2H, t), 3.88 (3H, s), 1.76 (2H, m), 1.19 (2H, m), 0.84 (3H, t) ppm.

<sup>13</sup>C NMR:  $\delta$  = 169.7, 137.9, 137.6, 134.6, 132.2, 129.0, 128.0, 127.2, 124.0, 122.7, 49.1, 36.1, 31.8, 30.0, 29.5, 29.5, 29.4, 29.3, 29.2, 28.9, 26.0, 22.6, 14.4 ppm.

HRMS: calcd for [C<sub>16</sub>H<sub>31</sub>N<sub>2</sub>]<sup>+</sup>: 251.2482; found: 251.2476; calcd for [C<sub>10</sub>H<sub>9</sub>O<sub>3</sub>]<sup>-</sup>: 147.0441; found: 147.0442

#### 1-decyl-3-methylimidazolium cinnate ([C<sub>10</sub>mim][CA]):

<sup>1</sup>H NMR ((DMSO-d<sub>6</sub>):  $\delta$  = 9.87 (1H, s), 7.86 (1H, s), 7.78 (1H, s), 7.44 (2H, d), 7.30 (2H, t), 7.22

(1H, t), 7.06 (1H, d), 6.38 (1H, d), 4.17 (2H, t), 3.88 (3H, s), 1.74 (2H, m), 1.19 (2H, m), 0.82 (3H, t) ppm.

<sup>13</sup>C NMR:  $\delta$  = 170.0, 138.0, 137.5, 135.0, 131.7, 129.0, 128.1, 127.2, 124.0, 122.7, 49.1, 36.0, 31.8, 30.0, 29.4, 29.3, 29.2, 28.9, 26.0, 22.6, 14.4 ppm.

HRMS: calcd for [C<sub>14</sub>H<sub>27</sub>N<sub>2</sub>]<sup>+</sup>: 223.2169; found: 223.2151; calcd for [C<sub>10</sub>H<sub>9</sub>O<sub>3</sub>]<sup>-</sup>: 147.0441; found: 147.0449.

**1-octyl-3-methylimidazolium cinnate ([C<sub>8</sub>mim][CA]):**

<sup>1</sup>H NMR ((DMSO-d<sub>6</sub>):  $\delta$  = 9.41 (1H, s), 7.77 (1H, s), 7.70 (1H, s), 7.45 (2H, d), 7.31 (2H, t), 7.23 (1H, t), 7.08 (1H, d), 6.39 (1H, d), 4.14 (2H, t), 3.84 (3H, s), 1.74 (2H, m), 1.20 (2H, m), 0.82 (3H, t) ppm.

<sup>13</sup>C NMR:  $\delta$  = 171.8, 139.9, 139.3, 136.8, 133.7, 130.8, 129.9, 129.0, 125.8, 124.6, 50.9, 37.9, 33.5, 31.9, 30.8, 31.0, 27.9, 24.4, 16.2 ppm.

HRMS: calcd for [C<sub>12</sub>H<sub>23</sub>N<sub>2</sub>]<sup>+</sup>: 195.1856; found: 195.1843; calcd for [C<sub>10</sub>H<sub>9</sub>O<sub>3</sub>]<sup>-</sup>: 147.0441; found: 147.0448.

**1-hexyl-3-methylimidazolium cinnate ([C<sub>6</sub>mim][CA]):**

<sup>1</sup>H NMR ((DMSO-d<sub>6</sub>):  $\delta$  = 9.81 (1H, s), 7.85 (1H, s), 7.77 (1H, s), 7.44 (2H, d), 7.31 (2H, t), 7.23 (1H, t), 7.04 (1H, d), 6.37 (1H, d), 4.17 (2H, t), 3.88 (3H, s), 1.75 (2H, m), 1.22 (2H, m), 0.81 (3H, t) ppm.

<sup>13</sup>C NMR:  $\delta$  = 170.0, 137.9, 137.5, 134.9, 131.9, 129.0, 128.1, 127.2, 124.0, 122.7, 49.1, 36.1, 31.0, 29.9, 25.7, 22.4, 14.3 ppm.

HRMS (*m/z*): calcd for [C<sub>10</sub>H<sub>19</sub>N<sub>2</sub>]<sup>+</sup>: 167.1543; found: 167.1553; calcd for [C<sub>10</sub>H<sub>9</sub>O<sub>3</sub>]<sup>-</sup>: 147.0441; found: 147.0454.

**1-butyl-3-methylimidazolium cinnate ([C<sub>4</sub>mim][CA]):**

<sup>1</sup>H NMR ((DMSO-d<sub>6</sub>):  $\delta$  = 9.84 (1H, s), 7.85 (1H, s), 7.78 (1H, s), 7.44 (2H, d), 7.31 (2H, t), 7.23 (1H, t), 7.04 (1H, d), 6.37 (1H, d), 4.18 (2H, t), 3.88 (3H, s), 1.74 (2H, m), 1.23 (2H, m), 0.86 (3H, t) ppm.

<sup>13</sup>C NMR:  $\delta$  = 172.0, 140.2, 139.7, 136.9, 134.3, 131.2, 130.3, 129.4, 126.2, 124.9, 51.0, 38.3, 34.1, 21.5, 15.95 ppm.

HRMS (*m/z*): calcd for [C<sub>8</sub>H<sub>15</sub>N<sub>2</sub>]<sup>+</sup>: 139.1230; found: 139.1239; calcd for [C<sub>10</sub>H<sub>9</sub>O<sub>3</sub>]<sup>-</sup>: 147.0441; found: 147.0449.

Table S1. Bromide content in [C<sub>n</sub>mim][CA] ionic liquids

| IL                        | [Br <sup>-</sup> ]/mol.kg <sup>-1</sup> |
|---------------------------|-----------------------------------------|
| [C <sub>4</sub> mim][CA]  | 0.0010                                  |
| [C <sub>6</sub> mim][CA]  | 0.0079                                  |
| [C <sub>8</sub> mim][CA]  | 0.0073                                  |
| [C <sub>10</sub> mim][CA] | 0.0070                                  |
| [C <sub>12</sub> mim][CA] | <0.00002                                |

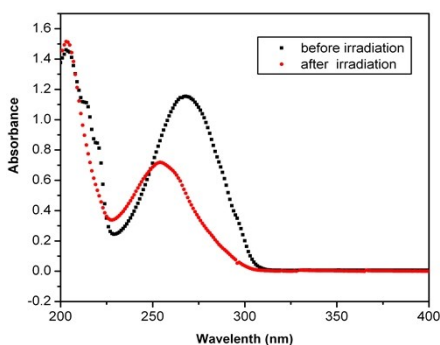

Fig. S1 UV-vis spectra of aqueous trans- cinnamic acid (H[CA])  
at the concentration of 1 mM before and after irradiation

<sup>1</sup>H -NMR spectra for [C<sub>n</sub>mim][CA] ionic liquids:

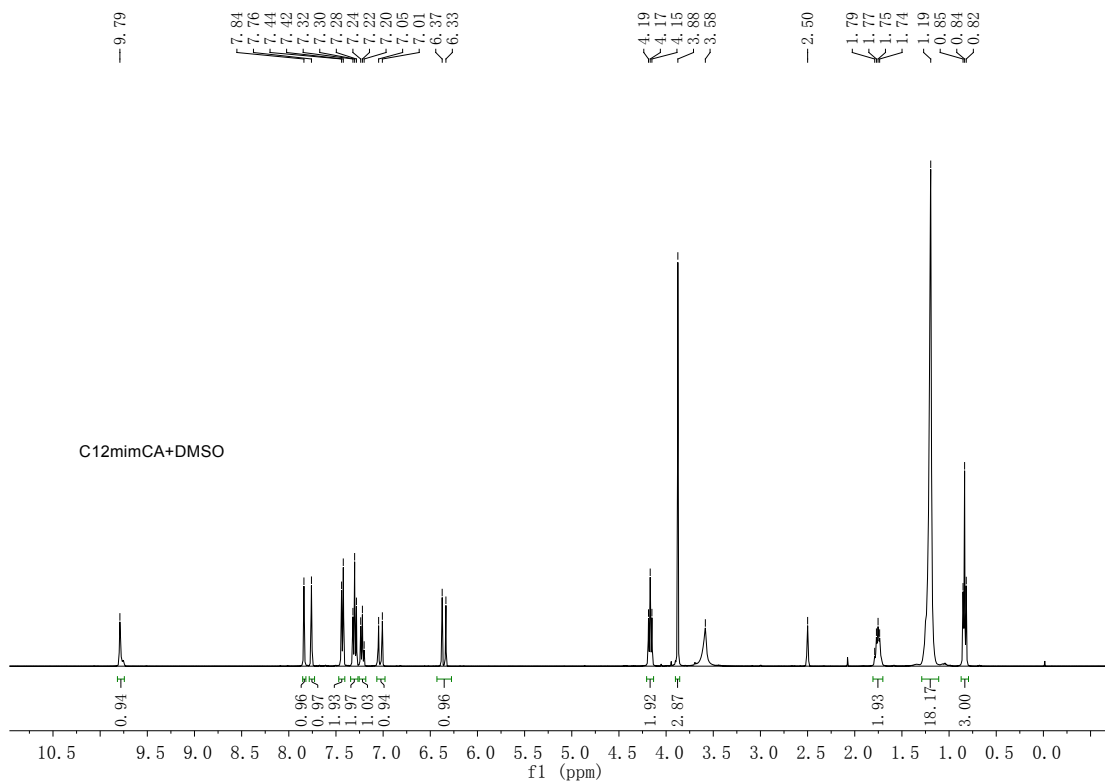

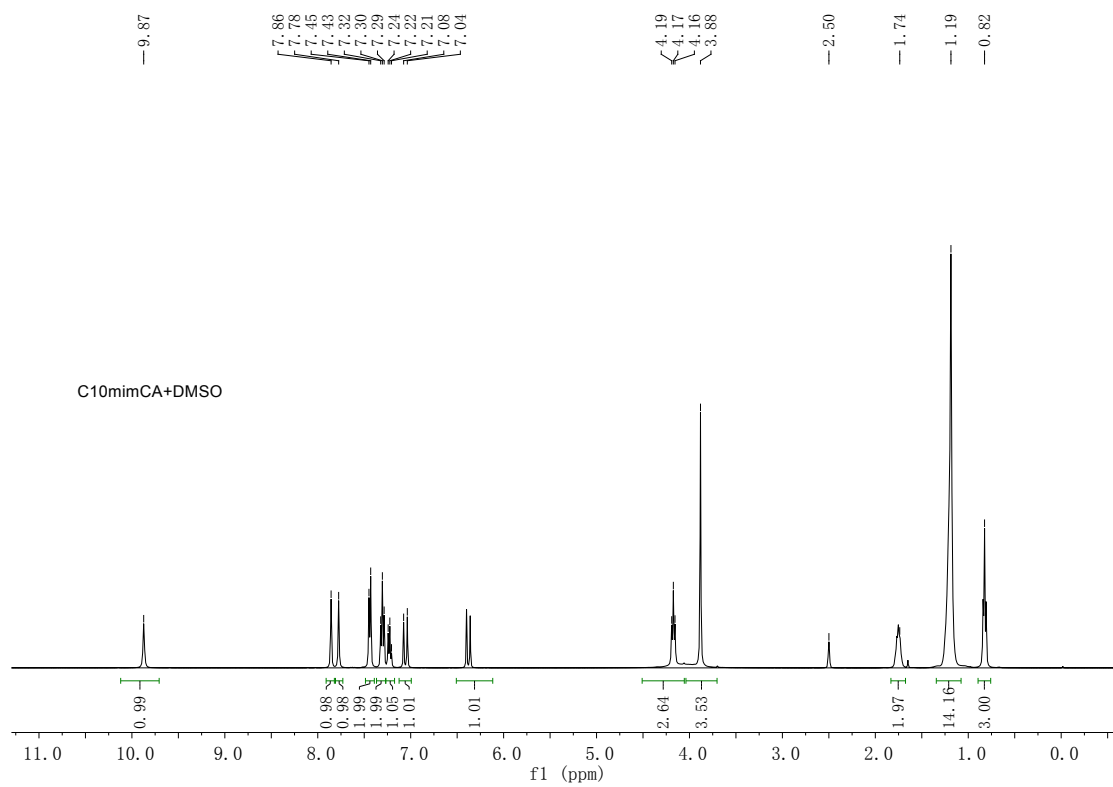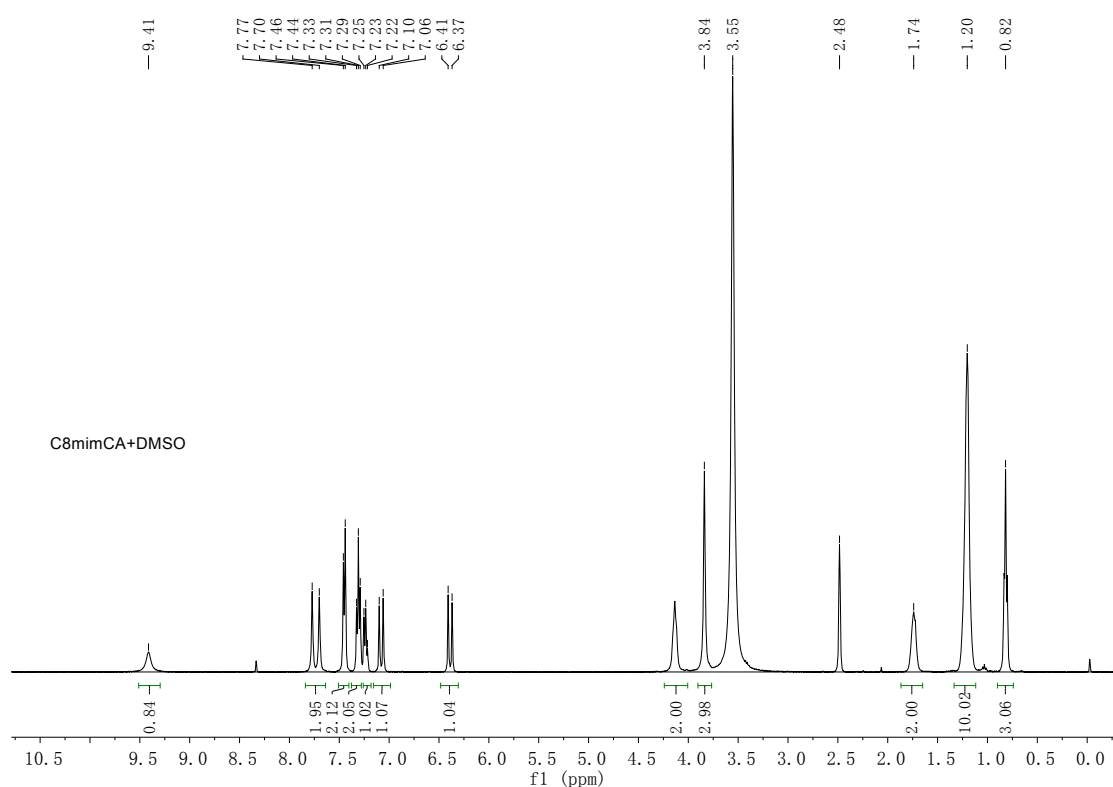

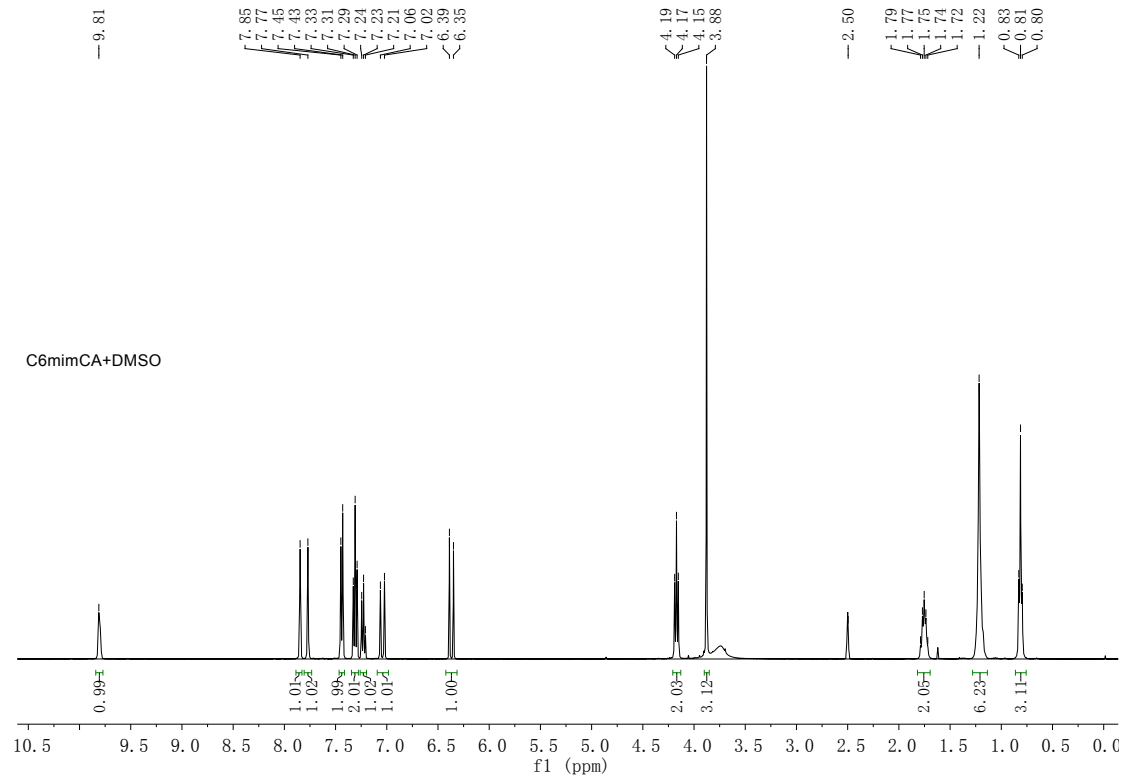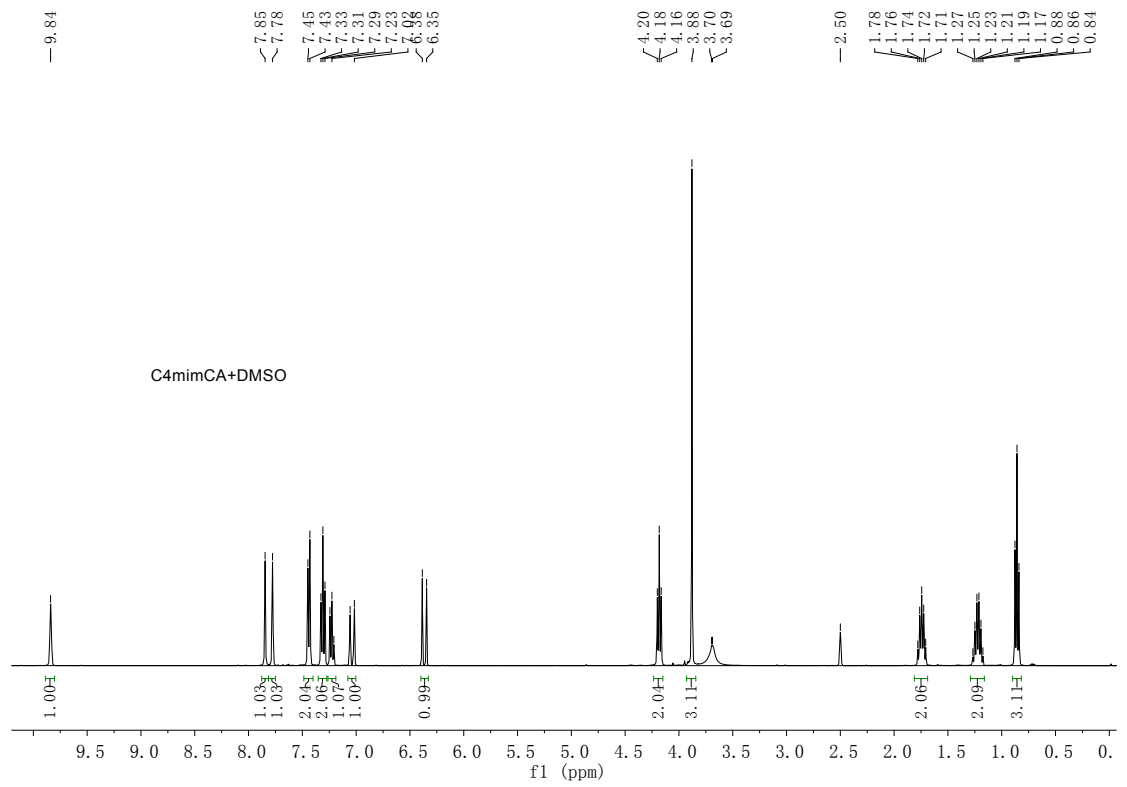

$^{13}\text{C}$ -NMR spectra for  $[\text{C}_n\text{mim}][\text{CA}]$  ionic liquids:

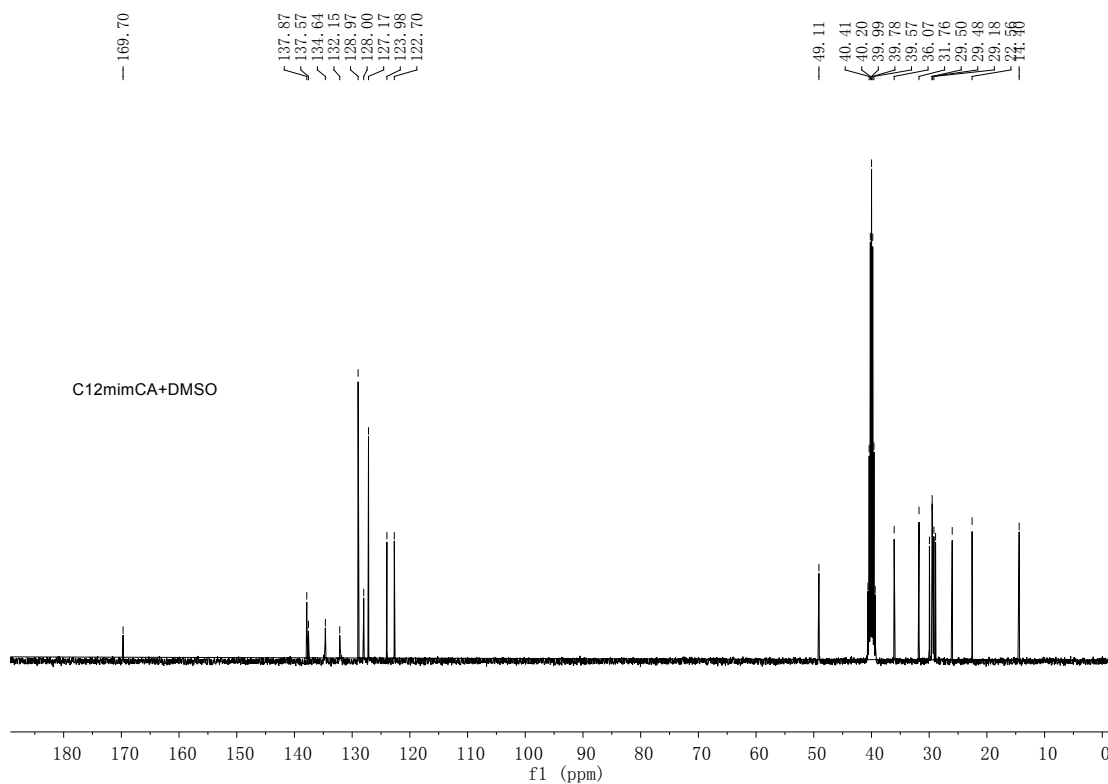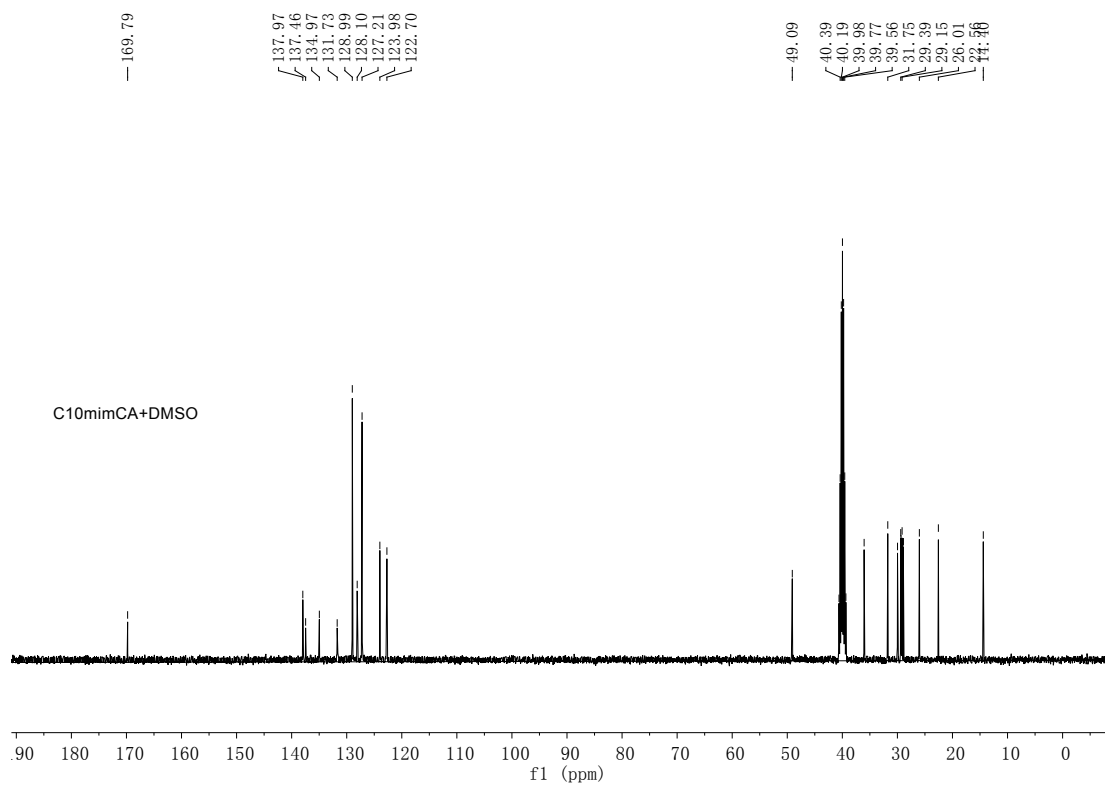

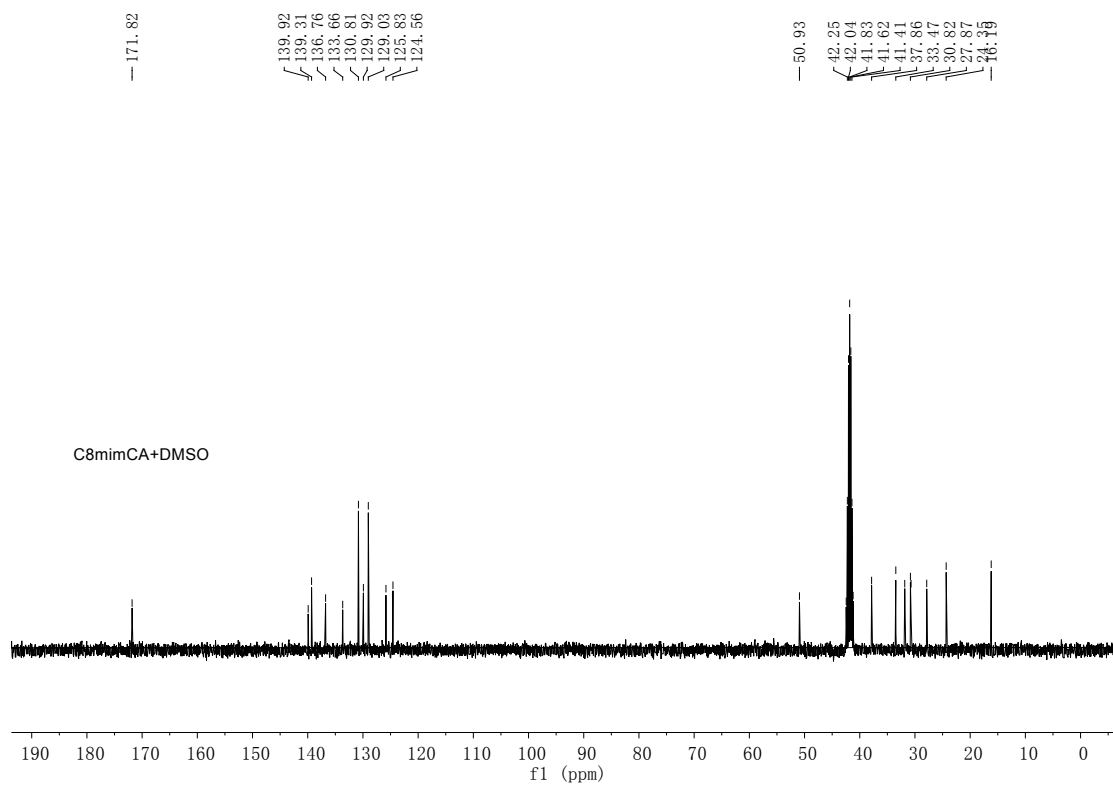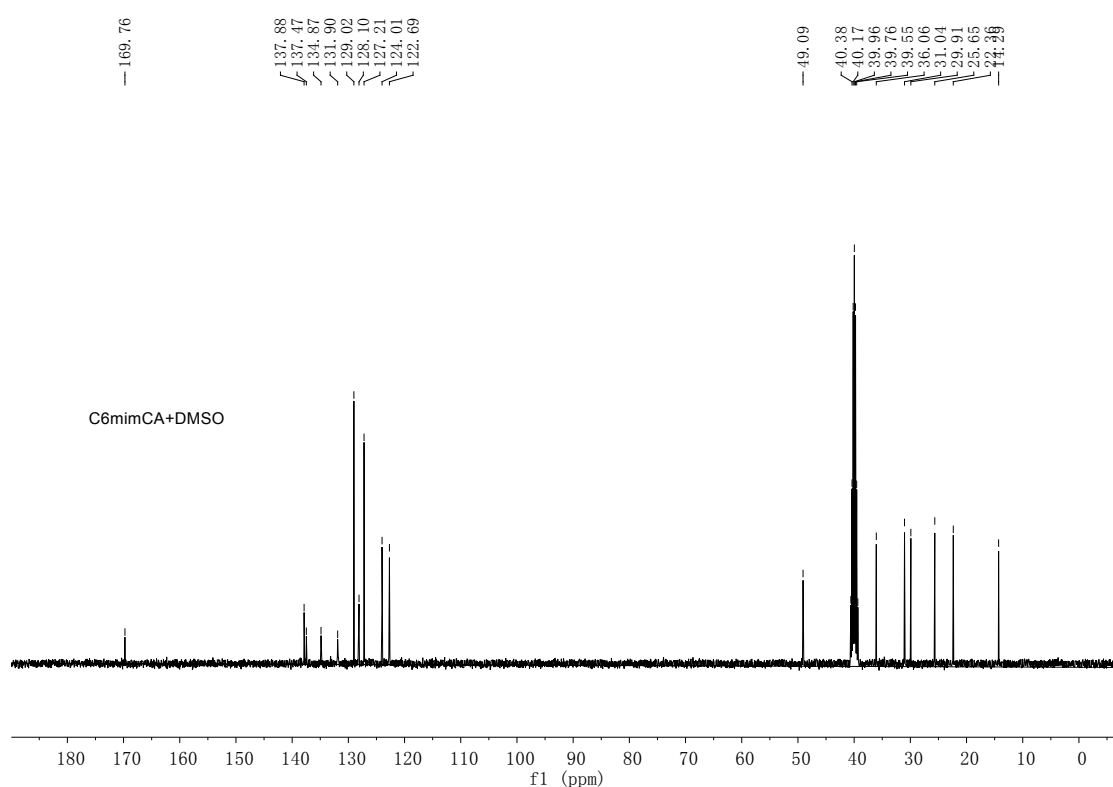

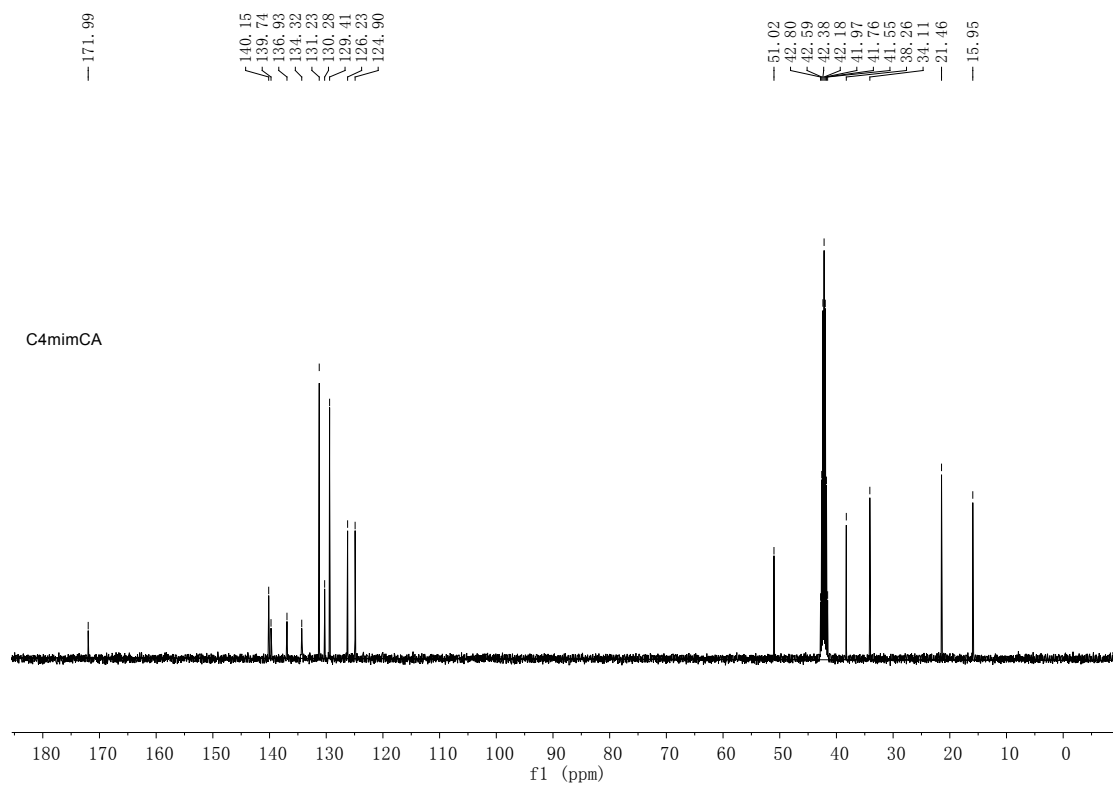

Supplement: c5ra20772j1.pdf [file c5ra20772j1.pdf]
